# Supplementary material for: Improving the Clinical Outcome in Stroke Patients Receiving Thrombolytic or Endovascular Treatment in Korea: from the SECRET Study
Source: PubMed Central journal article supplement (PMC7141338; doi:10.3390/jcm9030717), 2020-03-06
Supplement: jcm-09-00717-s001.pdf [file jcm-09-00717-s001.pdf]

**Supplementary Material**

**Improving the clinical outcome in stroke patients receiving thrombolytic or endovascular treatment in Korea: from the SECRET study**

**Supplementary Table S1.** Independent determinants for functional outcome at discharge

|                                       | Ordinal logistic regression<br>(increase in mRS) |        |                     |        | Binary logistic regression<br>(mRS ≤2 vs. mRS >2) |        |                     |        |
|---------------------------------------|--------------------------------------------------|--------|---------------------|--------|---------------------------------------------------|--------|---------------------|--------|
|                                       | OR (95% CI)                                      | P*     | OR (95% CI)         | P†     | OR (95% CI)                                       | P*     | OR (95% CI)         | P†     |
| Calendar year                         |                                                  |        |                     |        |                                                   |        |                     |        |
| 2012                                  | 1                                                |        | 1                   |        | 1                                                 |        | 1                   |        |
| 2013                                  | 0.83 (0.548–1.256)                               | 0.377  | 0.7 (0.401–1.224)   | 0.211  | 1.214 (0.708–2.083)                               | 0.481  | 1.440 (0.650–3.189) | 0.369  |
| 2014                                  | 0.727 (0.486–1.088)                              | 0.122  | 0.557 (0.327–0.95)  | 0.032  | 1.564 (0.923–2.651)                               | 0.096  | 2.190 (1.019–4.708) | 0.045  |
| 2015                                  | 0.564 (0.377–0.843)                              | 0.005  | 0.492 (0.288–0.84)  | 0.009  | 2.075 (1.230–3.502)                               | 0.006  | 2.255 (1.054–4.824) | 0.036  |
| 2017                                  | 0.481 (0.322–0.72)                               | <0.001 | 0.5 (0.297–0.842)   | 0.009  | 2.294 (1.358–3.874)                               | 0.002  | 2.259 (1.076–4.744) | 0.031  |
| Age                                   | 1.026 (1.017–1.036)                              | <0.001 | 1.024 (1.012–1.037) | <0.001 | 0.973 (0.961–0.985)                               | <0.001 | 0.973 (0.958–0.989) | 0.001  |
| Male sex                              | 0.957 (0.766–1.195)                              | 0.698  | 0.959 (0.727–1.265) | 0.768  | 1.031 (0.776–1.371)                               | 0.832  | 1.121 (0.770–1.633) | 0.551  |
| Diabetes                              | 2.352 (1.906–2.903)                              | <0.001 | 2.811 (2.157–3.665) | <0.001 | 0.462 (0.355–0.600)                               | <0.001 | 0.387 (0.274–0.548) | <0.001 |
| Current smoking                       | 1.139 (0.867–1.497)                              | 0.349  | 1.067 (0.744–1.530) | 0.724  | 0.998 (0.706–1.410)                               | 0.991  | 1.067 (0.657–1.730) | 0.794  |
| Atrial fibrillation or atrial flutter | 0.755 (0.609–0.935)                              | 0.01   | 0.8 (0.614–1.043)   | 0.099  | 1.383 (1.052–1.819)                               | 0.02   | 1.169 (0.822–1.664) | 0.384  |
| Congestive heart failure              | 1.014 (0.652–1.579)                              | 0.95   | 1.032 (0.627–1.699) | 0.9    |                                                   |        |                     |        |
| Previous stroke                       | 1.303 (1.009–1.683)                              | 0.042  | 1.361 (1.009–1.835) | 0.043  | 0.815 (0.586–1.134)                               | 0.225  | 0.885 (0.590–1.327) | 0.554  |
| Preadmission disability               | 3.658 (2.151–6.215)                              | <0.001 | 3.148 (1.719–5.760) | <0.001 | 0.058 (0.014–0.247)                               | <0.001 | 0.053 (0.007–0.406) | 0.005  |

|                                       |                     |        |                     |        |                     |        |                      |        |
|---------------------------------------|---------------------|--------|---------------------|--------|---------------------|--------|----------------------|--------|
| Last normal to ED                     | 1.001 (1.000–1.001) | 0.067  | 1 (1.000–1.001)     | 0.13   | 0.999 (0.999–1.000) | 0.146  | 0.999 (0.999–1.000)  | 0.225  |
| ED to treatment                       | 1.002 (1.001–1.004) | 0.01   | 1.003 (1.000–1.005) | 0.019  | 0.998 (0.995–1.000) | 0.047  | 0.997 (0.994–1.000)  | 0.060  |
| NIHSS at stroke onset                 | 1.124 (1.104–1.144) | <0.001 | 1.124 (1.099–1.150) | <0.001 | 0.888 (0.868–0.909) | <0.001 | 0.880 (0.852–0.909)  | <0.001 |
| Location site                         |                     |        |                     |        |                     |        |                      |        |
| ICA                                   |                     |        | 1                   |        |                     |        | 1                    |        |
| MCA                                   |                     |        | 1.018 (0.757–1.368) | 0.907  |                     |        | 0.706 (0.474–1.053)  | 0.088  |
| VBA                                   |                     |        | 1.365 (0.887–2.102) | 0.157  |                     |        | 0.395 (0.0212–0.735) | 0.003  |
| Others                                |                     |        | 1.251 (0.636–2.46)  | 0.516  |                     |        | 0.718 (0.288–1.788)  | 0.477  |
| Successful recanalization within 24 h |                     |        | 0.186 (0.134–0.259) | <0.001 |                     |        | 6.942 (4.195–11.487) | <0.001 |

---

ED, emergency department; NIHSS, National Institutes of Health Stroke Scale; ICA, internal carotid artery; MCA, middle cerebral artery; VBA, vertebrobasilar artery.

\*Adjusted for significant variables in the univariable analysis among the entire study population (n=1226)

†Adjusted for significant variables in the univariable analysis among patients who had arterial occlusion at initial angiographic studies and could determine whether a successful recanalization was achieved at follow-up angiographic studies (n=792)
